# Supplementary material for: A first-principles study of the stability, electronic structure, and optical properties of halide double perovskite Rb2Sn1−xTexI6 for solar cell applications
Source: Royal Society of Chemistry journal article supplement (doi:10.1039/d0cp05827k), 2021-01-01
Supplement: d0cp05827k1.pdf [file d0cp05827k1.pdf]

## Supporting information

### A first-principle study of the stability, electronic structure, and optical properties of halide double perovskite $\text{Rb}_2\text{Sn}_{1-x}\text{Te}_x\text{I}_6$ for solar cell applications

Muhammad Faizan<sup>1\*</sup>, Jiahao Xie<sup>2</sup>, Ghulam Murtaza<sup>3</sup>, Carlos Echeverría-Arrondo<sup>4</sup>, Thamraa Alshahrani<sup>5\*</sup>, Kailash Chandra Bhamu<sup>6</sup>, Amel Laref<sup>7</sup>, Iván Mora-Seró<sup>4\*</sup>, Shah Haidar Khan<sup>1\*</sup>

<sup>1</sup>Department of Physics, University of Peshawar, Peshawar 25120, Pakistan

<sup>2</sup>State Key Laboratory of Superhard Materials and School of Materials Science and Engineering, Jilin University, Changchun 130012, China

<sup>3</sup>Materials Modeling Lab, Department of Physics, Islamia College University, Peshawar 25120, Pakistan

<sup>4</sup>Institute of Advanced Materials (INAM), Universitat Jaume I, Castelló 12006, Spain

<sup>5</sup>Department of Physics, College of Science, Princess Nourah Bint Abdulrahman University, Riyadh 11671, Saudi Arabia

<sup>6</sup>School of Chemical Engineering, University of Ulsan, 93 Daehakro, Nam-Gu, Ulsan 44610, South Korea

<sup>7</sup>Department of Physics and Astronomy, College of Science, King Saud University, Riyadh 11451, King Saudi Arabia

\*Correspondence: [faizanstd@uop.edu.pk](mailto:faizanstd@uop.edu.pk), [thmalshahrani@pnu.edu.sa](mailto:thmalshahrani@pnu.edu.sa), [sero@uji.es](mailto:sero@uji.es), [shkhan@uop.edu.pk](mailto:shkhan@uop.edu.pk)

#### 1. Mechanical Properties

For mechanical properties, the elastic constants are calculated using the well-known stress–strain relationship (Hooke’s law)<sup>1</sup> by deforming the unit cell. The elastic tensor  $C_{ij}$  can be calculated as

$$\delta_{ij} = C_{ij} \cdot \varepsilon_{ij} \quad (1)$$

where  $\delta_{ij}$  and  $\varepsilon_{ij}$  are stress and strain tensors. For cubic symmetry, only three independent components ( $C_{11}$ ,  $C_{12}$ , and  $C_{44}$ ) are needed. To check the mechanical stability for cubic compounds, the elastic constant must satisfy the generalized Born stability conditions<sup>2</sup>:

$$1/3(C_{11}+2C_{12})>0, C_{11}>0, C_{44}>0, \text{ and } 1/2(C_{11}-C_{12})>0 \quad (2)$$

In addition to this, the Voigt-Reuss-Hill model<sup>3-4</sup> can be used to determine the other elastic parameters, such as bulk modulus (B), shear modulus (G), Young's modulus (E), Pugh's index ( $k = B/G$ ), anisotropy factor (A), and Poisson's ratio ( $\nu$ ) using standard relations. The calculated elastic constants of the pure and doped system are enlisted in Table S5. It is evident that all the system satisfy the Born stability criteria, thus showing the mechanical stability. The Cauchy pressure ( $C_{11}-C_{44}$ ) gives information about the ductility and brittleness of a compound. The positive (negative) value of  $C_{11}-C_{44}$  indicates the ductile (brittle) nature. From Table S5, it is inferred that the computed values of  $C_{11}-C_{44}$  are positive, implying the ductile nature for all these systems.

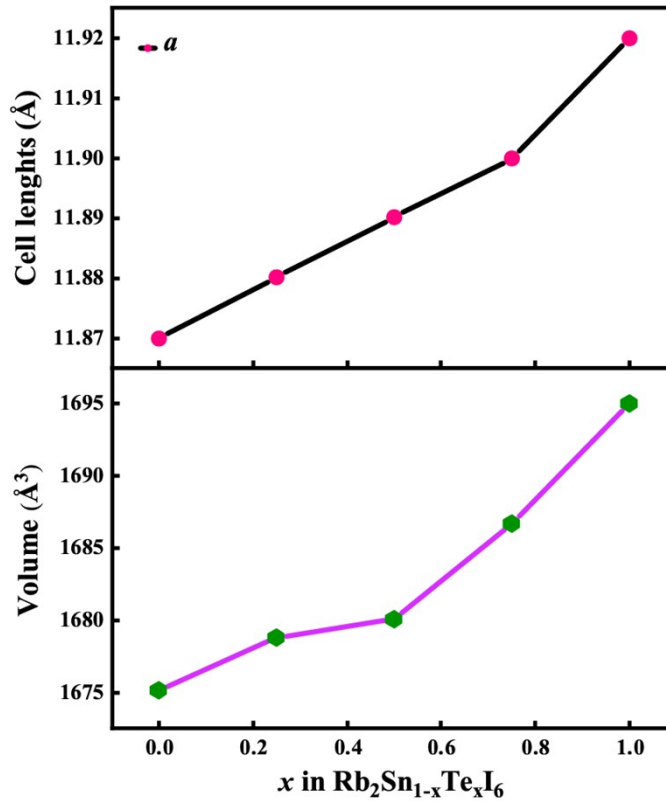

**Fig. S1.** The lattice parameter (top) and volume (bottom) as a function of  $x$  in  $\text{Rb}_2\text{Sn}_{1-x}\text{Te}_x\text{I}_6$  ( $0 \leq x \leq 1$ ).

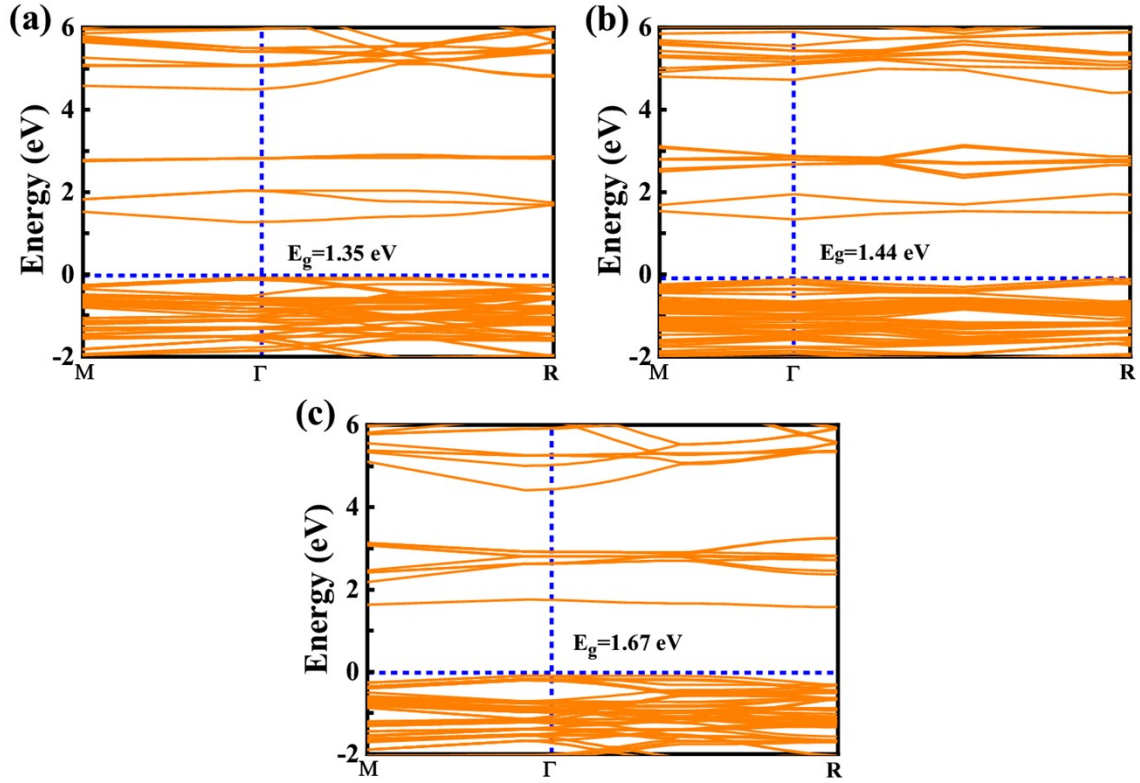

**Fig. S2.** Calculated band structure of  $\text{Rb}_2\text{Sn}_{0.75}\text{Te}_{0.25}\text{I}_6$  (a),  $\text{Rb}_2\text{Sn}_{0.50}\text{Te}_{0.50}\text{I}_6$  (b), and  $\text{Rb}_2\text{Sn}_{0.25}\text{Te}_{0.75}\text{I}_6$  (c) using HSE06 functional.

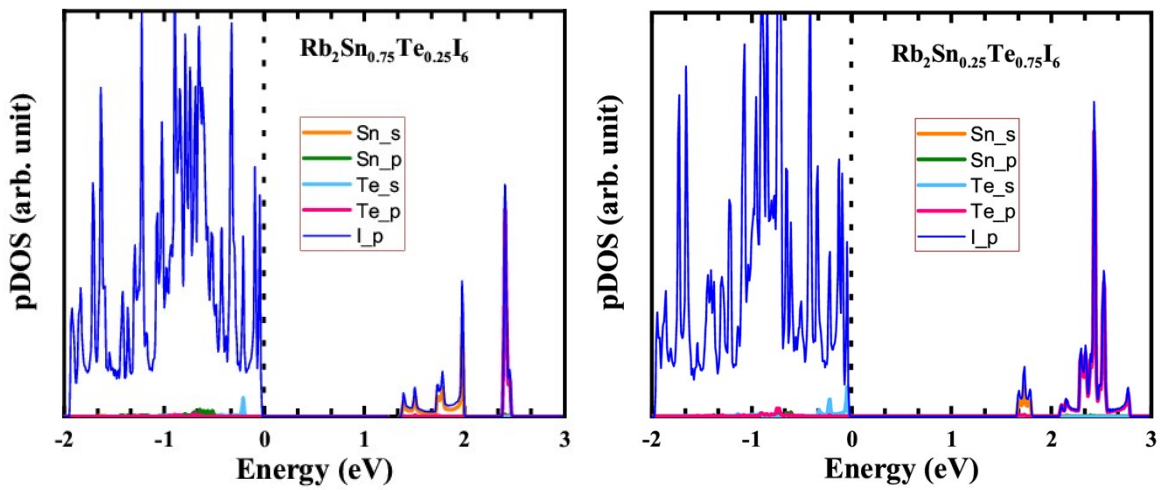

**Fig. S3.** DOS structures of  $\text{Rb}_2\text{Sn}_{0.75}\text{Te}_{0.25}\text{I}_6$  (left) and  $\text{Rb}_2\text{Sn}_{0.25}\text{Te}_{0.75}\text{I}_6$  (right) using HSE06 functional.



**Table S2.** Calculated tolerance factor  $t_{\text{eff}}$  and octahedral factor  $\mu_{\text{eff}}$  for  $\text{Rb}_2\text{Sn}_{1-x}\text{Te}_x\text{I}_6$  ( $0 \leq x \leq 1$ ).

|                                                                    | $t_{\text{eff}}$ | $\mu_{\text{eff}}$ |
|--------------------------------------------------------------------|------------------|--------------------|
| 0% Te ( $\text{Rb}_2\text{SnI}_6$ )                                | 0.96             | 0.31               |
| 25% Te ( $\text{Rb}_2\text{Sn}_{0.75}\text{Te}_{0.25}\text{I}_6$ ) | 0.94             | 0.35               |
| 50% Te ( $\text{Rb}_2\text{Sn}_{0.50}\text{Te}_{0.50}\text{I}_6$ ) | 0.92             | 0.38               |
| 75% Te ( $\text{Rb}_2\text{Sn}_{0.25}\text{Te}_{0.75}\text{I}_6$ ) | 0.89             | 0.41               |
| 100% Te ( $\text{Rb}_2\text{TeI}_6$ )                              | 0.87             | 0.44               |

**Table S3.** Competing phases considered in calculating the chemical potential space of  $\text{Rb}_2\text{SnI}_6$  and  $\text{Rb}_2\text{TeI}_6$  along with their corresponding formation energies in eV.

| Limits           | $\Delta H$ | Limits                     | $\Delta H$ |
|------------------|------------|----------------------------|------------|
| RbSn             | -0.612     | $\text{Rb}_2\text{Te}$     | -2.998     |
| $\text{RbSn}_3$  | -0.647     | $\text{Rb}_2\text{Te}_3$   | -3.584     |
| RbI              | -3.094     | $\text{Rb}_2\text{Te}_5$   | -3.772     |
| $\text{RbI}_3$   | -3.396     | TeI                        | -0.252     |
| $\text{SnI}_2$   | -1.711     | $\text{Te}_2\text{I}$      | -0.255     |
| $\text{SnI}_4$   | -2.1835    | $\text{TeI}_4$             | -0.918     |
| $\text{RbSnI}_3$ | -4.950     | $\text{Rb}_2\text{SnTe}_3$ | -4.226     |
| RbTe             | -1.676     |                            |            |

**Table S4.** Band gaps of  $\text{Rb}_2\text{Sn}_{1-x}\text{Te}_x\text{I}_6$  ( $0 \leq x \leq 1$ ) calculated at different levels of theory along with experimental values.

| Compound                                                | $E_{g(\text{PBE})}/\text{eV}$ | $E_{g(\text{mBJ})}/\text{eV}$ | $E_{g(\text{HSE})}/\text{eV}$ | Other cal.         | Exp:     |
|---------------------------------------------------------|-------------------------------|-------------------------------|-------------------------------|--------------------|----------|
| $\text{Rb}_2\text{SnI}_6$                               | 0.13                          | 0.75                          | 1.10                          | $1.13^{5*}/1.02^6$ | $1.32^5$ |
| $\text{Rb}_2\text{Sn}_{0.75}\text{Te}_{0.25}\text{I}_6$ | 0.64                          | 1.12                          | 1.35                          |                    |          |
| $\text{Rb}_2\text{Sn}_{0.50}\text{Te}_{0.50}\text{I}_6$ | 0.72                          | 1.19                          | 1.44                          |                    |          |
| $\text{Rb}_2\text{Sn}_{0.25}\text{Te}_{0.75}\text{I}_6$ | 1.06                          | 1.46                          | 1.67                          |                    |          |
| $\text{Rb}_2\text{TeI}_6$                               | 1.78                          | 2.14                          | 2.18                          |                    |          |

\*Band gap calculated for tetragonal phase of  $\text{Rb}_2\text{SnI}_6$

**Table S5.** Calculated elastic constants (in GPa), Bulk moduli (in GPa), Shear moduli (in GPa), Young's moduli (in GPa), Poisson's ratio ( $\nu$ ), Anisotropy factor ( $A$ ), and Pugh's ratio, of  $\text{Rb}_2\text{Sn}_{1-x}\text{Te}_x\text{I}_6$ .

| Compounds                                               | $C_{11}$ | $C_{12}$ | $C_{44}$ | $C_{11}-C_{44}$ | B     | G     | E      | $\nu$ | A    | B/G  |
|---------------------------------------------------------|----------|----------|----------|-----------------|-------|-------|--------|-------|------|------|
| $\text{Rb}_2\text{SnI}_6$                               | 116.56   | 65.30    | 60.10    | 5.19            | 82.39 | 83.31 | 186.93 | 0.12  | 2.34 | 0.98 |
| $\text{Rb}_2\text{Sn}_{0.75}\text{Te}_{0.25}\text{I}_6$ | 98.51    | 52.27    | 40.74    | 11.53           | 67.68 | 61.69 | 141.95 | 0.15  | 1.76 | 1.09 |
| $\text{Rb}_2\text{Sn}_{0.50}\text{Te}_{0.50}\text{I}_6$ | 109.27   | 63.73    | 47.01    | 16.71           | 78.91 | 73.36 | 168.02 | 0.14  | 2.06 | 1.07 |
| $\text{Rb}_2\text{Sn}_{0.25}\text{Te}_{0.75}\text{I}_6$ | 101.19   | 61.65    | 39.45    | 22.19           | 74.83 | 66.63 | 154.15 | 0.16  | 1.99 | 1.13 |
| $\text{Rb}_2\text{TeI}_6$                               | 113.92   | 51.27    | 44.22    | 7.04            | 72.15 | 64.18 | 148.51 | 0.16  | 1.41 | 1.12 |

## References

1. Le Page, Y.; Saxe, P., Symmetry-general least-squares extraction of elastic data for strained materials from ab initio calculations of stress. *Phys. Rev. B* 2002, **65**, 10, 104104.
2. Born, M. In *On the stability of crystal lattices. I*, Mathematical Proceedings of the Cambridge Philosophical Society, Cambridge University Press: 1940, 160-172.
3. Voigt, W., On the relation between the elasticity constants of isotropic bodies. *Ann. Phys. Chem* 1889, **274**, 573-587.
4. Hill, R., Proc. Phys. Soc.(London). *Sect. A* 1952, **65**, 349-54.
5. Maughan, A. E.; Ganose, A. M.; Almaker, M. A.; Scanlon, D. O.; Neilson, J. R., Tolerance factor and cooperative tilting effects in vacancy-ordered double perovskite halides. *Chem. Mater.* 2018, **30**, 11, 3909-3919.
6. Cai, Y.; Xie, W.; Ding, H.; Chen, Y.; Thirumal, K.; Wong, L. H.; Mathews, N.; Mhaisalkar, S. G.; Sherburne, M.; Asta, M., Computational Study of Halide Perovskite-Derived  $\text{A}_2\text{BX}_6$  Inorganic Compounds: Chemical Trends in Electronic Structure and Structural Stability. *Chem. Mater.* 2017, **29**, 18, 7740-7749.
